# Supplementary material for: Intranasally Administered MSC-Derived Extracellular Vesicles Reverse Cisplatin-Induced Cognitive Impairment
Source: MDPI journal article supplement (doi:10.3390/ijms241411862), 2023-07-24
Supplement: s1 [file s1]

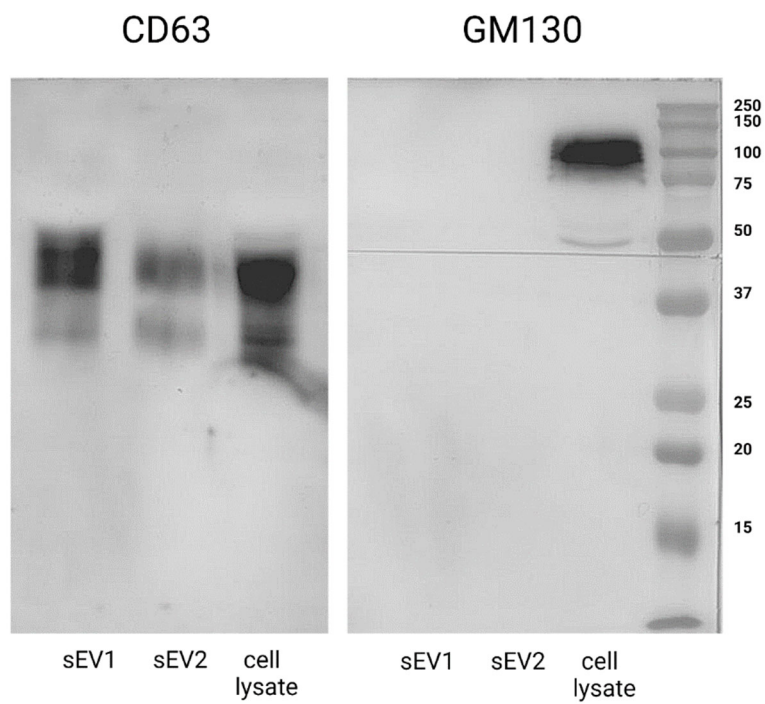

**Supplementary Figure S1. Protein marker profile of BM MSC-derived sEV.** sEV we probed for CD63 and anti-GM130 immunoreactivity in western blot. hMSC lysate was used as control.

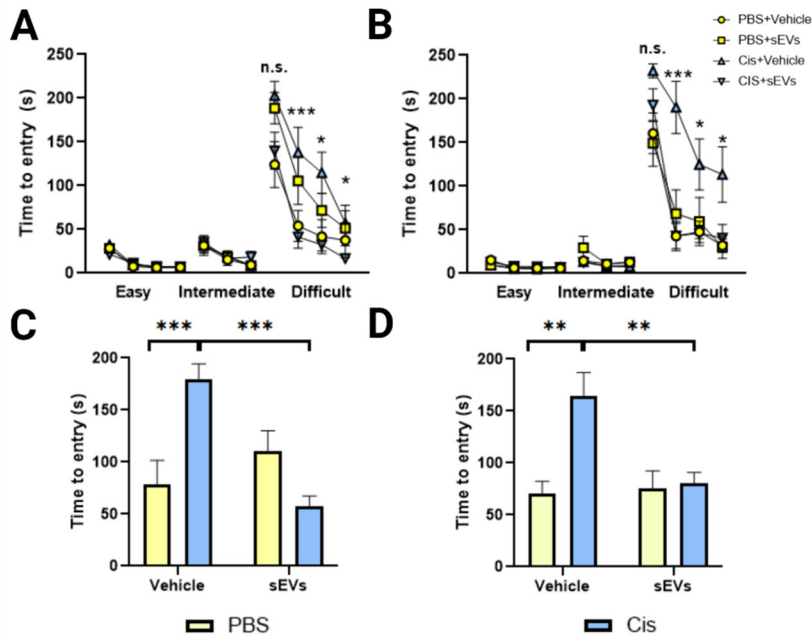

**Supplementary Figure S2. Cisplatin and sEV treatment have the same effect in male and female mice in PBT.** There is no effect on animal performance in PBT easy and intermediate trials, in both males (n=12) **(A)** and females (n=8) **(B)**.

Average time to entry into the dark chamber recorded in 4 difficult trials in males (n=12) **(C)** and females (n=8) **(D)**. Data were analyzed with two-way ANOVA, for cisplatin and sEV with Tukey's post-hoc analysis and the results are expressed as mean  $\pm$  SEM. \*\*\*p<0.001, \*\*p<0.01, \*p<0.1.

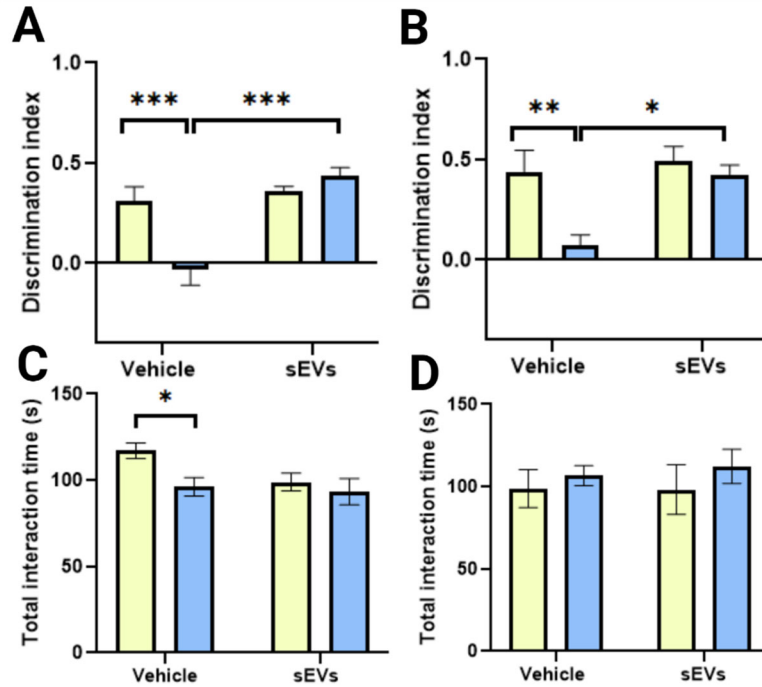

**Supplementary Figure S3. Cisplatin and sEV treatment have the same effect in male and female mice in NOPRT.** sEV treatment restores DI in males (n=12) **(A)** and females (n=8) **(B)**. Cisplatin and sEV effect on total interaction in NOPRT in (n=12) **(C)** and females (n=8) **(D)**. Data were analyzed with two-way ANOVA, for cisplatin and sEV with Tukey's post-hoc analysis and the results are expressed as mean  $\pm$  SEM. \*\*\*p<0.001, \*\*p<0.01, \*p<0.1.

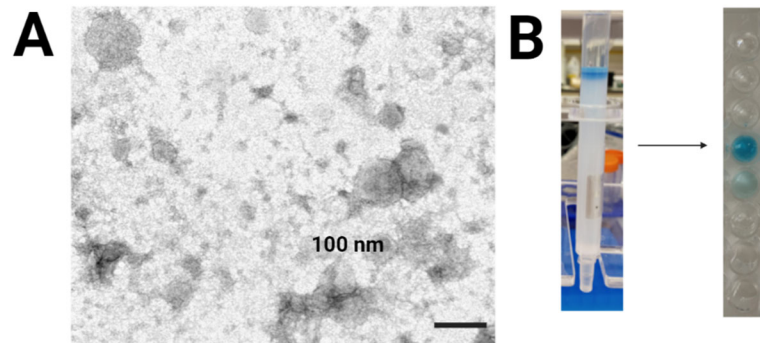

**Supplementary Figure S4. TEM of DiD-stained sEV. (A)** Typical morphology of sEV is preserved during staining. **(B)** Size exclusion chromatography showed DiD was present only in the exosome fraction.

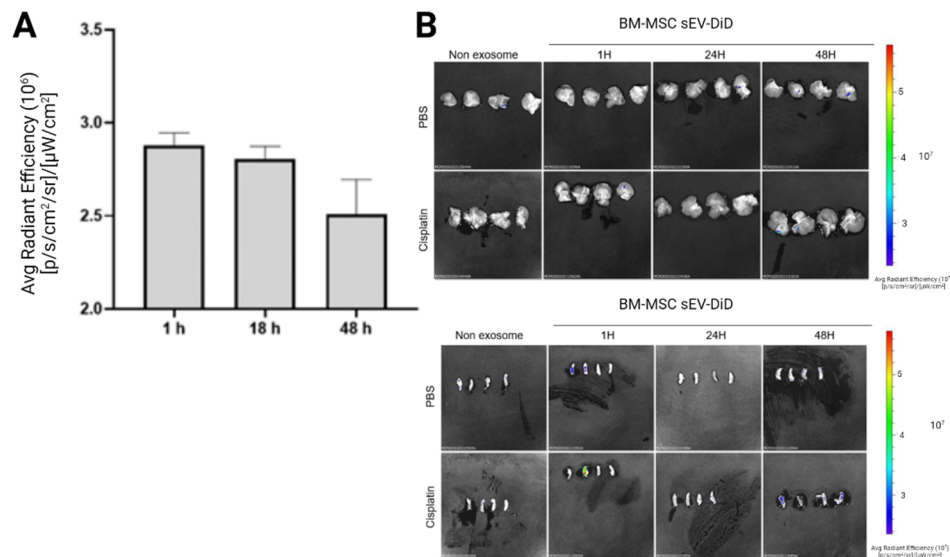

**Supplementary Figure S5. Quantification of DiD-signal in the brain and spatiotemporal distribution of signal in peripheral tissues. (A)** The fluorescent signal was quantified using LivingImage software. Data were analyzed with

student t-test. No significant difference was found. **(B)** No fluorescent signal was detected in liver and spleen.

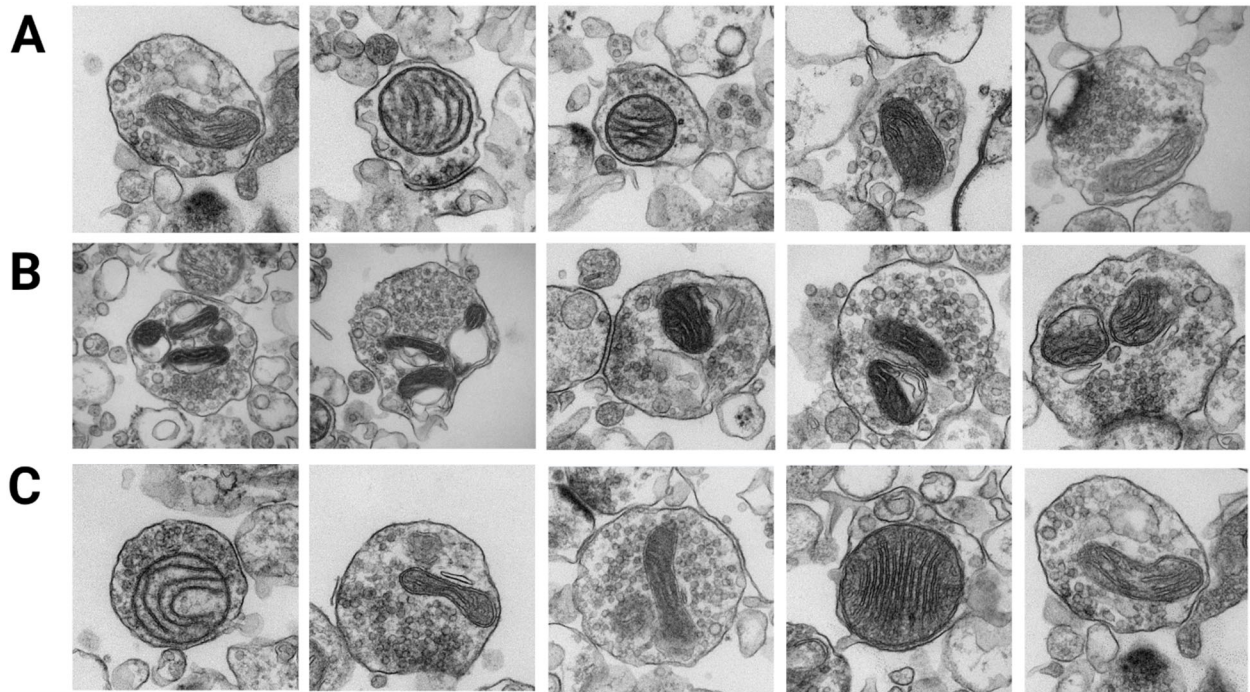

**Supplementary Figure S6. Representative images of mitochondrial morphology.**

**(A)** Animals treated with PBS **(B)** Animals treated with cisplatin **(C)** Animals treated with cisplatin/sEV.
